# Supplementary material
Source: PubMed Central journal article supplement (PMC4788085)
Supplement: stam849810.wt1_default.pdf [file stam849810.wt1_default.pdf]

**Supplementary Table 1 Mean change scores from baseline, SD and adjusted between group differences for main outcomes and for each subgroup at all follow-up time points (Note that 3days/1week, 3days\_2weeks/1week, and 2weeks/1week use only the 1 week follow-up from the Australian-based trial)**

|           | Time point         | Vertebroplasty |      |      | Placebo |      |      | Adjusted between group difference | 95% CI |      |
|-----------|--------------------|----------------|------|------|---------|------|------|-----------------------------------|--------|------|
|           |                    | n              | Mean | SD   | n       | Mean | SD   |                                   |        |      |
| Pain      | 3days/1week        | 103            | 2.3  | 2.9  | 100     | 2.9  | 2.8  | -0.5                              | -1.3   | 0.2  |
|           | 3days_2weeks/1week | 105            | 2.2  | 2.7  | 100     | 2.7  | 2.7  | -0.4                              | -1.1   | 0.3  |
|           | 2weeks/1week       | 102            | 2.2  | 2.8  | 99      | 2.5  | 3.0  | -0.2                              | -0.9   | 0.6  |
|           | 1 month            | 102            | 2.8  | 3.0  | 99      | 2.2  | 3.2  | 0.6                               | -0.2   | 1.4  |
| RMDQ      | 3days/1week        | 95             | 2.8  | 4.6  | 89      | 4.3  | 5.4  | -1.0                              | -2.4   | 0.4  |
|           | 3days_2weeks/1week | 97             | 3.0  | 4.3  | 89      | 4.3  | 5.0  | -0.9                              | -2.2   | 0.4  |
|           | 2weeks/1week       | 94             | 3.2  | 5.1  | 88      | 4.4  | 5.2  | -0.8                              | -2.2   | 0.7  |
|           | 1 month            | 94             | 4.1  | 5.9  | 89      | 3.9  | 6.1  | 0.8                               | -0.9   | 2.4  |
| EQ5D (US) | 1 month            | 94             | 0.12 | 0.19 | 88      | 0.11 | 0.23 | 0.03                              | -0.02  | 0.08 |

**SUB GROUPS**

**Pain duration**

**Pain scores**

|          |                    |    |     |     |    |     |     |      |      |     |
|----------|--------------------|----|-----|-----|----|-----|-----|------|------|-----|
| ≤6weeks  | 3days/1week        | 24 | 2.5 | 2.3 | 32 | 3.2 | 3.4 | -0.7 | -2.0 | 0.7 |
|          | 3days_2weeks/1week | 25 | 2.4 | 2.5 | 32 | 3.2 | 3.4 | -0.9 | -2.1 | 0.4 |
|          | 2weeks/1week       | 25 | 2.4 | 2.9 | 31 | 2.9 | 3.7 | -0.7 | -2.1 | 0.7 |
|          | 1 month            | 25 | 3.1 | 3.3 | 31 | 2.8 | 4.0 | 0.1  | -1.4 | 1.6 |
| >6 weeks | 3days/1week        | 79 | 2.2 | 3.1 | 68 | 2.8 | 2.5 | -0.4 | -1.3 | 0.4 |
|          | 3days_2weeks/1week | 80 | 2.2 | 2.8 | 68 | 2.5 | 2.4 | -0.2 | -1.0 | 0.6 |
|          | 2weeks/1week       | 77 | 2.1 | 2.7 | 68 | 2.3 | 2.6 | 0.1  | -0.8 | 0.9 |
|          | 1 month            | 77 | 2.7 | 2.9 | 68 | 2.0 | 2.7 | 0.8  | -0.1 | 1.8 |

**RMDQ scores**

|         |                    |    |     |     |    |     |     |      |      |     |
|---------|--------------------|----|-----|-----|----|-----|-----|------|------|-----|
| ≤6weeks | 3days/1week        | 23 | 2.4 | 4.2 | 29 | 4.0 | 5.5 | -0.8 | -3.4 | 1.7 |
|         | 3days_2weeks/1week | 24 | 2.4 | 4.1 | 29 | 4.2 | 5.2 | -1.3 | -3.6 | 1.1 |
|         | 2weeks/1week       | 24 | 2.3 | 4.5 | 28 | 4.5 | 5.4 | -1.6 | -4.3 | 1.0 |
|         | 1 month            | 24 | 3.8 | 5.9 | 28 | 4.4 | 5.4 | 0.2  | -3.0 | 3.4 |

|          |                    |    |     |     |    |     |     |      |      |     |
|----------|--------------------|----|-----|-----|----|-----|-----|------|------|-----|
| >6 weeks | 3days/1week        | 72 | 2.9 | 4.7 | 60 | 4.4 | 5.4 | -1.0 | -2.6 | 0.6 |
|          | 3days_2weeks/1week | 73 | 3.2 | 4.4 | 60 | 4.4 | 5.0 | -0.7 | -2.2 | 0.8 |
|          | 2weeks/1week       | 70 | 3.5 | 5.3 | 60 | 4.4 | 5.2 | -0.4 | -2.1 | 1.3 |
|          | 1 month            | 70 | 4.2 | 6.0 | 61 | 3.7 | 6.3 | 1.0  | -1.0 | 3.0 |

### EQ5D (US) scores

|          |         |    |      |      |    |      |      |      |       |      |
|----------|---------|----|------|------|----|------|------|------|-------|------|
| ≤6weeks  | 1 month | 24 | 0.15 | 0.24 | 28 | 0.15 | 0.30 | 0.03 | -0.06 | 0.13 |
| >6 weeks | 1 month | 70 | 0.11 | 0.18 | 60 | 0.09 | 0.20 | 0.03 | -0.03 | 0.09 |

---

### Baseline pain score

#### Pain scores

|        |                    |    |     |     |    |     |     |      |      |     |
|--------|--------------------|----|-----|-----|----|-----|-----|------|------|-----|
| Pain<8 | 3days/1week        | 55 | 1.4 | 2.7 | 51 | 2.1 | 2.3 | -0.7 | -1.7 | 0.4 |
|        | 3days_2weeks/1week | 56 | 1.4 | 2.6 | 51 | 1.7 | 2.2 | -0.2 | -1.1 | 0.8 |
|        | 2weeks/1week       | 55 | 1.5 | 2.7 | 51 | 1.3 | 2.4 | 0.4  | -0.7 | 1.4 |
|        | 1 month            | 56 | 1.9 | 2.8 | 52 | 1.1 | 2.8 | 0.8  | -0.3 | 1.9 |
| Pain≥8 | 3days/1week        | 48 | 3.4 | 2.8 | 49 | 3.8 | 3.0 | -0.4 | -1.5 | 0.6 |
|        | 3days_2weeks/1week | 49 | 3.2 | 2.5 | 49 | 3.8 | 2.8 | -0.7 | -1.7 | 0.3 |

|              |    |     |     |    |     |     |      |      |     |
|--------------|----|-----|-----|----|-----|-----|------|------|-----|
| 2weeks/1week | 47 | 3.0 | 2.6 | 48 | 3.7 | 3.0 | -0.8 | -1.8 | 0.3 |
| 1 month      | 46 | 3.9 | 2.9 | 47 | 3.5 | 3.2 | 0.3  | -0.8 | 1.5 |

**RMDQ scores**

|        |                    |    |       |     |    |     |     |      |      |     |
|--------|--------------------|----|-------|-----|----|-----|-----|------|------|-----|
| Pain<8 | 3days/1week        | 51 | 2.5   | 3.7 | 48 | 4.1 | 4.6 | -1.3 | -3.2 | 0.6 |
|        | 3days_2weeks/1week | 52 | 2.9   | 4.1 | 48 | 4.2 | 4.6 | -1.0 | -2.7 | 0.7 |
|        | 2weeks/1week       | 51 | 3.3   | 5.4 | 48 | 4.3 | 5.0 | -0.6 | -2.5 | 1.4 |
|        | 1 month            | 52 | 4.2   | 6.0 | 49 | 4.4 | 6.4 | 0.2  | -2.1 | 2.5 |
| Pain≥8 | 3days/1week        | 44 | 3.2   | 5.4 | 41 | 4.4 | 6.2 | -0.6 | -2.7 | 1.4 |
|        | 3days_2weeks/1week | 45 | 3.2   | 4.6 | 41 | 4.4 | 5.5 | -0.8 | -2.7 | 1.1 |
|        | 2weeks/1week       | 43 | 3.012 | 4.8 | 40 | 4.5 | 5.5 | -1.0 | -3.2 | 1.2 |
|        | 1 month            | 42 | 4.1   | 5.9 | 40 | 3.3 | 5.6 | 1.39 | -1.2 | 3.9 |

**EQ5D (US) scores**

|        |         |    |      |      |    |      |      |      |       |      |
|--------|---------|----|------|------|----|------|------|------|-------|------|
| Pain<8 | 1 month | 55 | 0.09 | 0.17 | 48 | 0.07 | 0.21 | 0.02 | -0.04 | 0.09 |
| Pain≥8 | 1 month | 42 | 0.16 | 0.21 | 40 | 0.15 | 0.25 | 0.05 | -0.03 | 0.12 |

SD = standard deviation, CI = confidence interval. ‡ Estimates of mean change from regression models adjusting for trial. Positive values for mean change indicate improvements from baseline. Positive values for between group differences favour the vertebroplasty group, negative values favour the placebo group. \*modified, 23-question Roland-Morris Disability Questionnaire.
