# Supplementary material
Source: PubMed Central journal article supplement (PMC4788085)
Supplement: stam849810.wt2_default.pdf [file stam849810.wt2_default.pdf]

The following table shows results from generalised linear binomial modelling of data relating to RRs for clinically important changes from baseline by baseline pain subgroup and pain duration subgroup. These were data 'not shown' in manuscript

### Sub-group analyses for clinically important change in pain

**Supplementary Table 2. Baseline pain score (<8 or ≥8)**

**At least 30% change**

| Predictor                 | Risk Ratio | Std. Err | z     | P> z  | [95% Conf. Interval] |        |
|---------------------------|------------|----------|-------|-------|----------------------|--------|
| <b>3days/1week</b>        |            |          |       |       |                      |        |
| VP group†                 | 0.979      | 0.058    | -0.35 | 0.730 | 0.870                | 1.102  |
| baseline.pain_ge8§        | 1.282      | 0.266    | 1.20  | 0.230 | 0.854                | 0.923  |
| <b>3days_2weeks/1week</b> |            |          |       |       |                      |        |
| VP group†                 | 0.906      | 0.0758   | -1.18 | 0.238 | 0.769                | 1.0675 |
| baseline.pain_ge8§        | 1.286      | 0.274    | 1.18  | 0.239 | 0.846                | 1.954  |
| <b>2 weeks/1week</b>      |            |          |       |       |                      |        |
| VP group†                 | 1.011      | 0.166    | 0.07  | 0.946 | 0.733                | 1.395  |
| baseline.pain_ge8§        | 1.400      | 0.211    | 2.24  | 0.025 | 1.0423               | 1.880  |
| <b>1 month4</b>           |            |          |       |       |                      |        |
| VP group                  | 1.313      | 0.195    | 1.83  | 0.067 | 0.981                | 1.758  |
| baseline.pain_ge8         | 1.157      | 0.243    | 0.70  | 0.486 | 0.767                | 1.747  |

† Vertebroplasty group compared with the placebo group; § Baseline pain score ≥8 compared with baseline pain score <8

After adjusting for baseline pain score (<8/ ≥8), there were no between-treatment group differences at any time point in the proportion achieving at least 30% improvement in pain score. At the 2weeks/1week time point those with a baseline pain score ≥8 were more likely to achieve at least 30% improvement in pain score.
