# Supplementary material
Source: PubMed Central journal article supplement (PMC4788085)
Supplement: stam849810.wt3_default.pdf [file stam849810.wt3_default.pdf]

The following table shows results from generalised linear binomial modelling of data relating to RRs for clinically important changes from baseline by baseline pain subgroup and pain duration subgroup. These were data 'not shown' in manuscript

**Supplementary Table 3. Baseline pain score (<8 or ≥8)**

**At least 3 unit change**

| Predictor                 | Risk Ratio | Std. Err | z     | P> z  | [95% Conf. Interval] |       |
|---------------------------|------------|----------|-------|-------|----------------------|-------|
| <b>3days/1week</b>        |            |          |       |       |                      |       |
| VP group†                 | 0.966      | 0.070    | -0.47 | 0.636 | 0.838                | 1.114 |
| baseline.pain_ge8§        | 1.593      | 0.313    | 2.37  | 0.018 | 1.084                | 2.340 |
| <b>3days_2weeks/1week</b> |            |          |       |       |                      |       |
| VP group†                 | 0.965      | 0.073    | -0.47 | 0.640 | 0.832                | 1.119 |
| baseline.pain_ge8§        | 1.706      | 0.311    | 2.93  | 0.003 | 1.194                | 2.438 |
| <b>2 weeks/1week</b>      |            |          |       |       |                      |       |
| VP group†                 | 0.955      | 0.138    | -0.32 | 0.749 | 0.719                | 1.268 |
| baseline.pain_ge8§        | 1.885      | 0.234    | 5.12  | 0.000 | 1.479                | 2.403 |
| <b>1 month4</b>           |            |          |       |       |                      |       |
| VP group                  | 1.248      | 0.201    | 1.38  | 0.169 | 0.910                | 1.712 |
| baseline.pain_ge8         | 1.373      | 0.232    | 1.88  | 0.060 | 0.986                | 1.911 |

† Vertebroplasty group compared with the placebo group; § Baseline pain score ≥8 compared with baseline pain score <8

After adjusting for baseline pain score (<8/ ≥8), there were no between-treatment group differences at any time point in the proportion achieving at least 30% improvement in pain score. At the 3days/1week, the 3days\_2weeks/1week and the 2 weeks/1week time points those with a baseline pain score ≥8 were more likely to achieve at least 3 units improvement in pain score.
