# Supplementary material
Source: PubMed Central journal article supplement (PMC4788085)
Supplement: stam849810.wt4_default.pdf [file stam849810.wt4_default.pdf]

The following table shows results from generalised linear binomial modelling of data relating to RRs for clinically important changes from baseline by baseline pain subgroup and pain duration subgroup. These were data 'not shown' in manuscript

**Supplementary Table 4. Pain duration ( $\leq 6$  weeks /  $> 6$  weeks)**

**At least 30% change**

| Predictor                 | Risk Ratio | Std. Err | z      | P> z  | [95% Conf. Interval] |       |
|---------------------------|------------|----------|--------|-------|----------------------|-------|
| <b>3days/1week</b>        |            |          |        |       |                      |       |
| VP group†                 | 0.960      | 0.079    | -0.500 | 0.616 | 0.817                | 1.127 |
| paindur>6w*               | 0.946      | 0.138    | -0.380 | 0.704 | 0.711                | 1.259 |
| <b>3days_2weeks/1week</b> |            |          |        |       |                      |       |
| VP group†                 | 0.918      | 0.086    | -0.910 | 0.360 | 0.765                | 1.102 |
| paindur>6w*               | 0.860      | 0.088    | -1.460 | 0.144 | 0.703                | 1.052 |
| <b>2 weeks/1week</b>      |            |          |        |       |                      |       |
| VP group†                 | 1.046      | 0.190    | 0.250  | 0.806 | 0.732                | 1.494 |
| paindur>6w*               | 0.859      | 0.077    | -1.710 | 0.088 | 0.721                | 1.023 |
| <b>1 month4</b>           |            |          |        |       |                      |       |
| VP group                  | 1.318      | 0.195    | 1.870  | 0.062 | 0.986                | 1.762 |
| paindur>6w*               | 0.962      | 0.099    | -0.370 | 0.710 | 0.786                | 1.178 |

† Vertebroplasty group compared with the placebo group; § pain duration  $>6$  weeks compared with pain duration  $\leq 6$  weeks

After adjusting for duration of pain ( $\leq 6$  weeks/  $< 6$  weeks), there were no between-treatment group differences at any time point in the proportion achieving at least 30% improvement in pain score.
