# Supplementary material
Source: PubMed Central journal article supplement (PMC4788085)
Supplement: stam849810.wt5_default.pdf [file stam849810.wt5_default.pdf]

The following table shows results from generalised linear binomial modelling of data relating to RRs for clinically important changes from baseline by baseline pain subgroup and pain duration sub-group. These were data 'not shown' in manuscript

**Supplementary Table 5. Pain duration ( $\leq 6$  weeks /  $> 6$  weeks)**

**At least 3 unit change**

| <b>Predictor</b>          | <b>Risk Ratio</b> | <b>Std. Err</b> | <b>z</b> | <b>P&gt; z </b> | <b>[95% Conf. Interval]</b> |       |
|---------------------------|-------------------|-----------------|----------|-----------------|-----------------------------|-------|
| <b>3days/1week</b>        |                   |                 |          |                 |                             |       |
| VP group†                 | 0.919             | 0.104           | -0.750   | 0.456           | 0.736                       | 1.148 |
| paindur>6w*               | 0.955             | 0.120           | -0.360   | 0.716           | 0.746                       | 1.222 |
| <b>3days_2weeks/1week</b> |                   |                 |          |                 |                             |       |
| VP group†                 | 0.963             | 0.108           | -0.340   | 0.734           | 0.773                       | 1.200 |
| paindur>6w*               | 0.860             | 0.070           | -1.860   | 0.062           | 0.734                       | 1.008 |
| <b>2 weeks/1week</b>      |                   |                 |          |                 |                             |       |
| VP group†                 | 0.983             | 0.168           | -0.100   | 0.918           | 0.703                       | 1.374 |
| paindur>6w*               | 0.801             | 0.114           | -1.560   | 0.118           | 0.606                       | 1.058 |
| <b>1 month4</b>           |                   |                 |          |                 |                             |       |
| VP group                  | 1.247             | 0.199           | 1.380    | 0.166           | 0.912                       | 1.705 |
| paindur>6w*               | 0.908             | 0.117           | -0.750   | 0.451           | 0.705                       | 1.168 |

† Vertebroplasty group compared with the placebo group; \* Baseline pain score  $\geq 8$  compared with baseline pain score  $< 8$

After adjusting for duration of pain ( $\leq 6$  weeks/  $< 6$  weeks), there were no between-treatment group differences at any time point in the proportion achieving at least 3 units improvement in pain score.
